# Supplementary material for: The nucleoporin ELYS/Mel28 regulates nuclear envelope subdomain formation in HeLa cells
Source: PubMed Central journal article supplement — Nucleus. 2012 Mar 1;3(2):187–99. doi: 10.4161/nucl.19595 (PMC3383574; doi:10.4161/nucl.19595), 2012-03-01
Supplement: nucl-3-187-s07.pdf [file nucl-3-187-s07.pdf]

**Supplemental Material to:**

Michaela Clever, Tomoko Funakoshi, Yasuhiro Mimura, Masatoshi Takagi and Naoko Imamoto. The nucleoporin ELYS/Mel28 regulates nuclear envelope subdomain formation in HeLa cells. *Nucleus* 2012; 3(2):

<http://dx.doi.org/10.4161/nucl.3.2.19595>

<http://www.landesbioscience.com/journals/nucleus/article/19595>

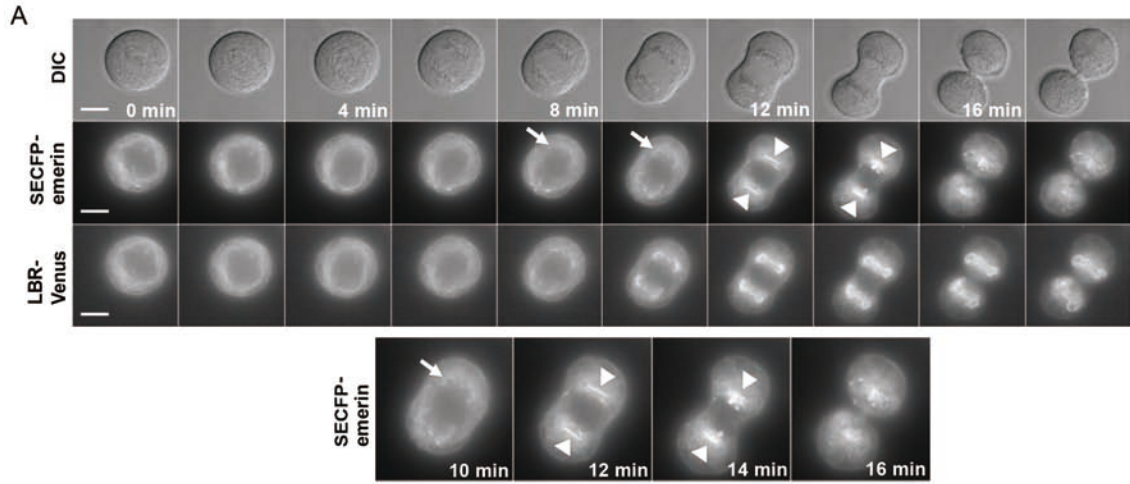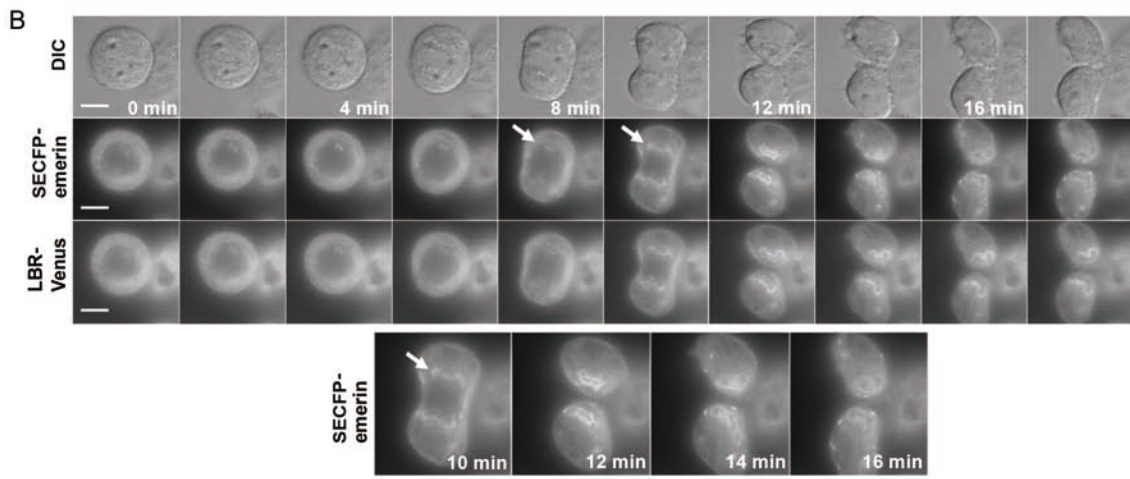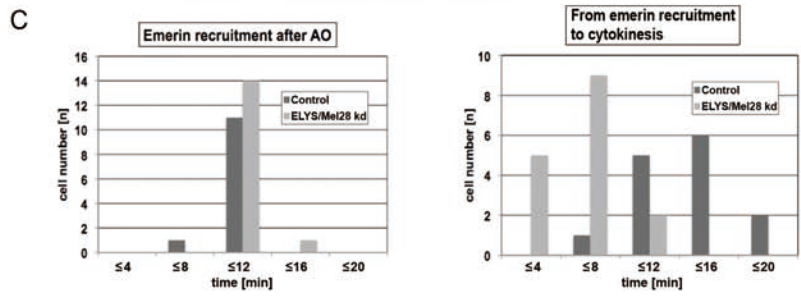

**Figure S1. The depletion of ELYS/Mel28 hinders accumulation of SECFP-emerin at the core region but does not change the time of its recruitment and accelerates entry into cytokinesis.** Live imaging with HeLa cells stably expressing LBR-Venus and SECFP-emerin was performed as described in **Figure 1**. **(A)** Cells treated with RNAi oligos either against firefly luciferase (control). **(B)** Cells treated with RNAi oligos against ELYS/Mel28 (ELYS/Mel28 kd) for 48 h. Arrowheads show SECFP-emerin accumulating at the core region, and arrows show initial targeting of SECFP-emerin to the chromosomes. Scale bars = 10  $\mu$ m. **(C)** SECFP-emerin recruitment after anaphase onset (AO) and the time between recruitment of SECFP-emerin and cytokinesis was determined in live imaging experiments, described in **Figure 1**. Data from three independent experiments were analyzed (n = 15 for the ELYS/Mel28 kd, n = 12 for the control). Note, that the data used for this analysis derived from live imaging experiments in **Figure 1**.

A

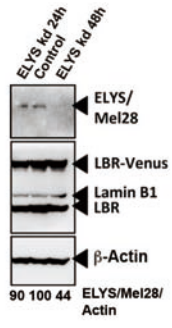

B

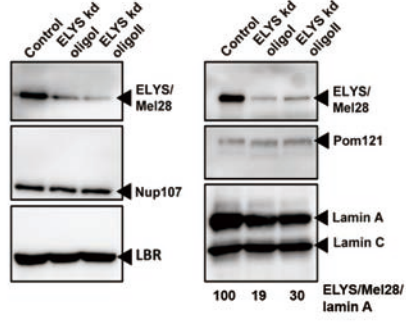

C

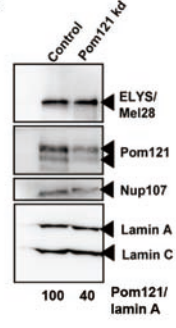

D

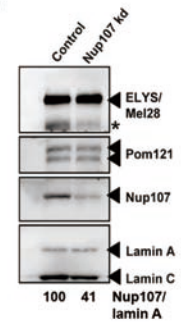

**Figure S2. RNAi depletion of different nucleoporins is shown by Western blotting.** (A) The Western blot analysis demonstrated the depletion of ELYS/Mel28 with an RNAi oligo I for the indicated times in HeLa cells stably expressing LBR-Venus. Extracts of  $2 \times 10^5$  cells/lane were analyzed using SDS-PAGE (7–20% gradient gel), followed by immunoblotting and detection of indicated proteins. Detection of  $\beta$ -actin served as the loading control. (B) Unsynchronized HeLa cells were treated with two RNAi oligos recognizing different sequences against ELYS/Mel28 for 50 h. Extracts of  $1 \times 10^5$  cells were loaded in duplicates for SDS-PAGE (7% polyacrylamide gel), immunoblotting and detection of indicated proteins. The Western blot analysis showed that RNAi reduced Pom121 (C) and Nup107 (D) in mitotic extracts under the conditions described in **Figure 2**. Extracts of  $2 \times 10^5$  cells/lane were analyzed by SDS-PAGE, immunoblotted used for detection of indicated proteins. The anti-Pom121 antibody recognizes a double band when used to detect Pom121 from mitotic extracts (see Funakoshi et al.<sup>57</sup>). Detection of lamin A/C served as the loading control in (B-D). Asterisks mark the nonspecific signals. Depletion efficiencies using signal intensities were evaluated with ImageJ software.

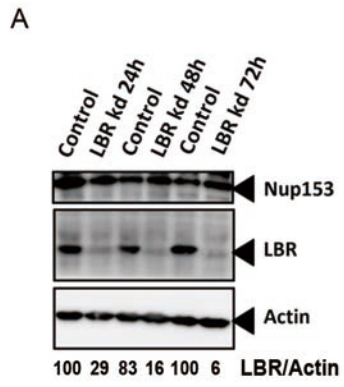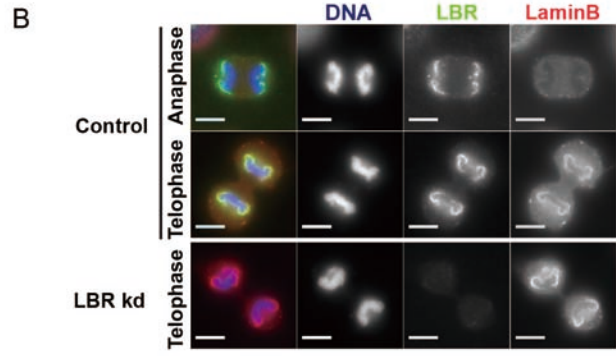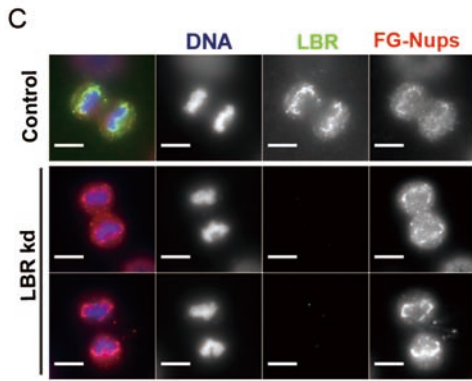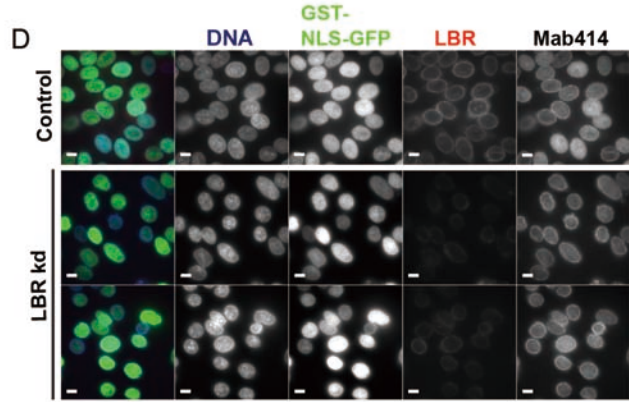

**Figure S3. The depletion of the LBR does not affect postmitotic NPC assembly, the nuclear transport in interphase or the recruitment of lamin B to mitotic chromosomes.** (A) The Western blot analysis shows the reduction of the LBR after siRNA treatment for the indicated time.  $2 \times 10^5$  cells/lane were applied to SDS-PAGE, immunoblotting and detection of indicated proteins. The depletion efficiency using signal intensities was evaluated with ImageJ software. Cells depleted of LBR by RNAi for 65 h were immunostained for lamin B and LBR (B) or for nucleoporins (FG-Nups) with an antibody against Nup153, which recognizes Nup62, Nup153 and Nup 214 (C). All pictures shown in are projections of image stacks (distance = 0.2  $\mu\text{m}$ ; three images). (D) HeLa cells reduced of LBR by RNAi for 50 h were tested in an *in vitro* transport assay<sup>S1</sup> and immunostained for LBR and nucleoporins (mAB414). GST–NLS–GFP served as the cargo in the transport assay. Scale bars = 10  $\mu\text{m}$ .

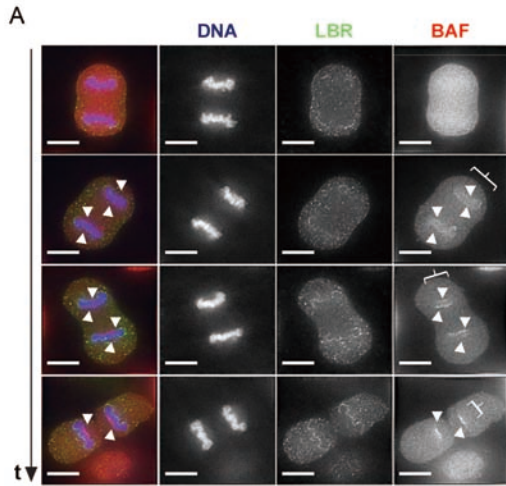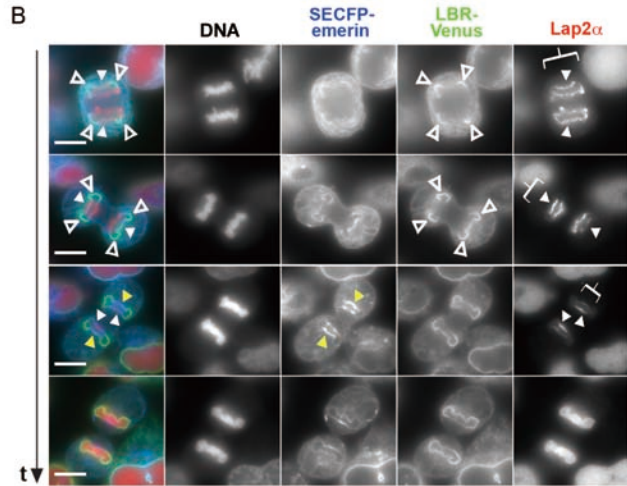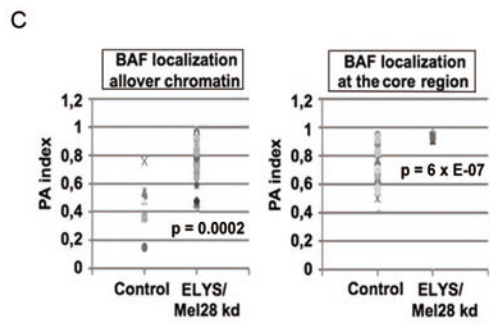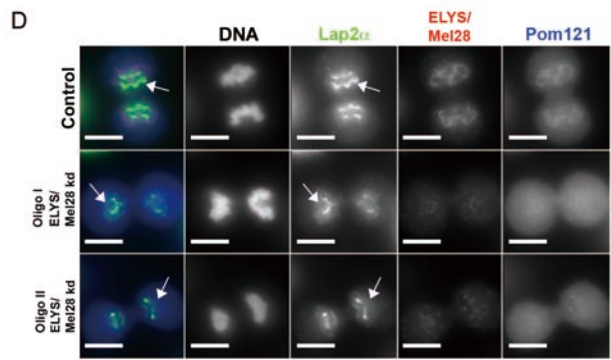



**Figure S4. The dynamic localization of BAF and Lap2 $\alpha$  at the core region is disturbed by the depletion of ELYS/Mel28.** (A) BAF and the LBR were co-stained in HeLa cells by IF and aligned according their progression through mitosis. Pictures were deconvoluted using Softworx software. Arrowheads indicate BAF at the core region. (B) SECFP–emerin (yellow arrowheads)- and LBR–Venus (open arrowheads)-expressing cells were stained by IF for Lap2 $\alpha$  (white arrowheads) to examine the localization of Lap2 $\alpha$  relative to SECFP-emerin during mitosis. The white brackets correspond to the length of the core region, which becomes more focused during mitosis. (C) The progression from anaphase to telophase is expressed by the post-anaphase progression (PA) index, which considers the length and width of the mitotic cell, which changes with the furrowing of the cell membrane (PA index =  $1 - \text{width}/\text{length}$ ; Uehara and Goshima<sup>67</sup>). As observed in **Figure 4D**, BAF localization with regard to the PA index was examined (n = 43 for the control, n = 45 for the ELYS/Mel28 kd cells). (D) Cells were treated with two RNAi oligos against ELYS/Mel28 for 50 h and stained for Lap2 $\alpha$ . Scale bars = 10  $\mu\text{m}$ . The pictures are projections of image stacks (distance = 0.2  $\mu\text{m}$ ; three images).

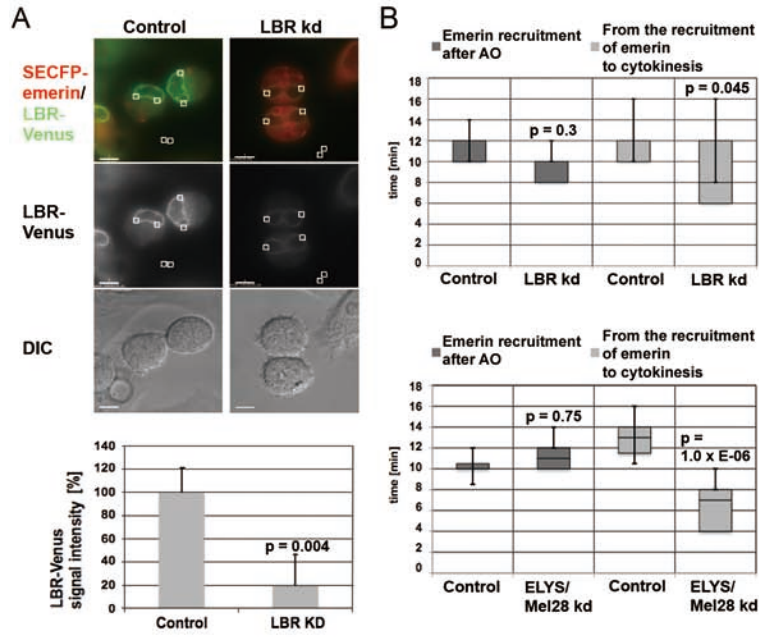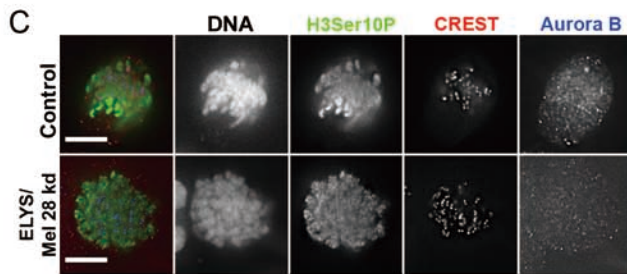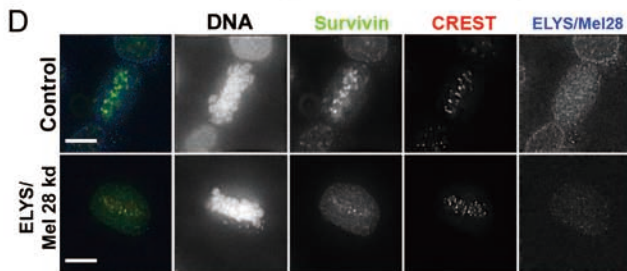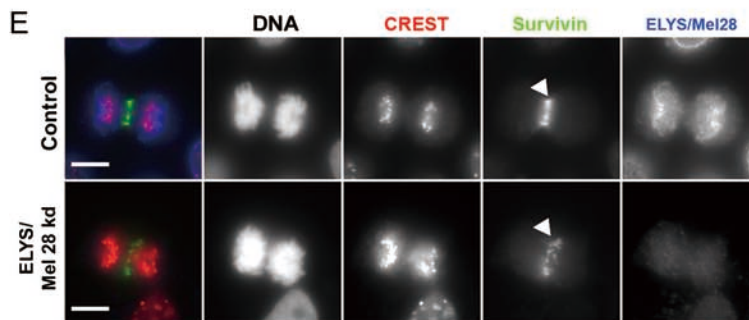

**Figure S5. Different from the depletion of the LBR, the ELYS/Mel28-depletion accelerates entry into cytokinesis, which might be connected to the mislocalization of the chromosomal passenger complex (CPC).** (A) The depletion efficiency of LBR in live imaging of **Figure 5** was estimated by quantification of the LBR-Venus signal according to the same method used to quantify ELYS/Mel28 as in **Figure 1**. The LBR-Venus signal was compared in control cells and in cells depleted of the LBR (n = 12 for control cells, n = 10 for LBR kd cells). Scale bar = 5  $\mu\text{m}$ . (B) The recruitment of SECFP-emerin after AO and the time between SECFP-emerin recruitment to cytokinesis was determined in live experiments in **Figures 1 and 5**. The mislocalization of the CPC components upon ELYS/Mel28-depletion was detected by IF staining of Aurora B kinase and its substrate histone 3, which is phosphorylated on serine 10 (C) or of survivin and CREST (D) in prophase cells. The pictures were deconvoluted using Softworx. Scale bars = 10  $\mu\text{m}$ . (E) The localization of survivin after AO to the central spindle was disrupted in ELYS/Mel28-depleted cells, as shown by the IF staining of survivin and CREST. The white arrows indicate the midzone. The pictures are projections of image stacks (distance = 0.2  $\mu\text{m}$ ; three images). Scale bars = 10  $\mu\text{m}$ .

## Supplementary movies

**Movie S1:** Live imaging of control cells associated with Figure 1A.

Live imaging was conducted with HeLa cells stably expressing LBR-Venus/SECFP-emerin. Images were captured every 2 min as described in Materials and Methods. Red: emerin, Green: LBR.

**Movie S2:** Live imaging of control cells associated with Figure 1A.

Live imaging was conducted with HeLa cells stably expressing LBR-Venus/SECFP-emerin. Images were captured every 2 min as described in Materials and Methods. Emerin alone is shown.

**Movie S3:** Live imaging of ELYSkd cells associated with Figure 1B.

Live imaging was conducted with HeLa cells stably expressing LBR-Venus/SECFP-emerin depleted of ELYS/Mel28 by siRNA transfection for 48h. Images were captured every 2 min as described in Materials and Methods. Red: emerin, Green: LBR.

**Movie S4:** Live imaging of ELYSkd cells associated with Figure 1B.

Live imaging was conducted with HeLa cells stably expressing LBR-Venus/SECFP-emerin depleted of ELYS/Mel28 by siRNA transfection for 48h. Images were captured every 2 min as described in Materials and Methods. Emerin alone is shown.

**Movie S5:** Live imaging of LBR kd cells associated with Figure 5B.

Live imaging was conducted with HeLa cells stably expressing LBR-Venus/SECFP-emerin depleted of LBR by siRNA transfection for 48h. Images were captured every 2 min as described in Materials and Methods. Red: emerin, Green: LBR.

**Movie S6:** Live imaging of LBR kd cells associated with Figure 5B.

Live imaging was conducted with HeLa cells stably expressing LBR-Venus/SECFP-emerin depleted of LBR by siRNA transfection for 48h. Images were captured every 2 min as described in Materials and Methods. Emerin alone is shown.

### **Supplementary material and methods:**

**Antibodies.** The following antibodies were used in this study: mouse anti- $\beta$ -Actin (cat. no. F3022, SIGMA), mouse anti-Aurora B (cat. no. A78720, Transduction Laboratories), human anti-CREST (cat. no. CS1058, human nuclear ANA-centromere autoantibody, CORTEX Biochem), rabbit anti-phospho histone 3 serine 10 (cat. no. 9701, cell signaling technologies), rabbit anti-Survivin (cat. no. ab469, Abcam) and mouse anti-Nup153 (cat. no. ab24700, Abcam). The following secondary antibodies were used (Molecular Probes, Invitrogen): goat anti human Alexa 594 (cat. no. A11014).

***In vitro* transport assay.** The *in vitro* transport assay was performed as described previously.<sup>S1</sup> For siRNA transfection, HeLa cells were plated onto 16-chamber slides (cat. no. 178599, LabTek<sup>TM</sup>, Nunc), synchronized, and transfected with siRNA oligos for the indicated times, then subjected to the assay.

### **References:**

S1. Kose S, Imamoto N, Tachibana T, Shimamoto T, Yoneda Y. Ran-unassisted nuclear migration of a 97-kD component of nuclear pore-targeting complex. *J Cell Biol* 1997; 139:841-9.

The other refs. 57 and 67 can be found in the reference list of the main manuscript.
